# Supplementary material for: Debridement, Antibiotics and Implant Retention: A Systematic Review of Strategies for Treatment of Early Infections after Revision Total Knee Arthroplasty
Source: MDPI journal article supplement (doi:10.3390/jcm12155026), 2023-07-31
Supplement: s1 [file s1]

## **Supplementary materials. Systematic search strategies per database.**

### **Systematic search strategies.**

We acquired studies from the following databases; PubMed, Cochrane Library, Embase (ScienceDirect), SciElo, LILACS and TripMedicalDatabase. The searches were conducted in July 2023. Only English studies were included.

### **PubMed Search**

#### **1.1 Domain: Revision arthroplasty**

Reoperation[Mesh] OR Reoperation\*[tiab] OR Revision surgery\*[tiab] OR aseptic revision\*[tiab] OR revision total knee arthroplasty\*[tiab] OR revision arthroplasty\*[tiab] OR revision\*[tiab] OR re-revision\*[tiab]

**AND**

#### **1.2 Domain: Total knee arthroplasty**

Arthroplasty, Replacement, Knee[Mesh] OR arthroplasties[MeSH Terms] OR total knee arthroplasty\*[tiab] OR total knee prosthesis\*[tiab] OR TKA\*[tiab] OR knee arthroplasty\*[tiab]

**AND**

#### **1.3 Domain: Infection**

Infections[Mesh] OR periprosthetic joint infection\*[tiab] OR prosthetic joint infection\*[tiab] OR pji\*[tiab] OR positive cultures\*[tiab] OR organisms\*[tiab]

**AND**

#### **1.4 Domain: Treatment**

DAIR\*[tiab] OR debridement, antibiotics, implant retention\*[tiab] OR debridement and implant retention\*[tiab] OR debridement, implant retainment\*[tiab] OR debridement\*[tiab] OR antibiotics\*[tiab]

Search: (1.1 Domain: Revision arthroplasty AND 1.2 Domain: Total knee arthroplasty AND 1.3 Domain: Infection AND 1.4 Domain: Treatment), resulted in 1015 hits.

## **Cochrane library**

### **2.1 Domain: Revision arthroplasty**

MeSH descriptor: [Reoperation] explode all trees OR revision surgery:ti,ab,kw OR re-revision:ti,ab,kw OR revision arthroplasty:ti,ab,kw OR aseptic revision:ti,ab,kw

**AND**

### **2.2 Domain: Total knee arthroplasty**

MeSH descriptor: [Arthroplasty, Replacement, Knee] explode all trees OR total knee arthroplasty:ti,ab,kw OR total knee prosthesis:ti,ab,kw OR TKA:ti,ab,kw OR total knee replacement:ti,ab,kw

**AND**

### **2.3 Domain: Infection**

MeSH descriptor: [Infections] explode all trees OR joint infection:ti,ab,kw OR prosthetic joint infection:ti,ab,kw OR PJI:ti,ab,kw OR periprosthetic joint infection:ti,ab,kw OR positive cultures:ti,ab,kw

**AND**

### **2.4 Domain: Treatment**

debridement, antibiotics and implant retention:ti,ab,kw OR DAIR:ti,ab,kw OR antibiotics:ti,ab,kw OR debridement:ti,ab,kw

Search: (2.1 Domain: Revision arthroplasty AND 2.2 Domain: Total knee arthroplasty AND 2.3 Domain: Infection AND 2.4 Domain: Treatment), resulted in 35 hits.

## **Embase**

### **3.1 Domain: Revision arthroplasty**

Title, abstract, keywords: revision surgery OR revision arthroplasty

**AND**

### **3.2 Domain: Total knee arthroplasty**

Title, abstract, keywords: total knee arthroplasty OR total knee prosthesis

**AND**

### **3.3 Domain: Infection**

Title, abstract, keywords: prosthetic joint infection OR PJI OR periprosthetic joint infection

**AND**

### **3.4 Domain: Treatment**

Title, abstract, keywords: debridement, antibiotics and implant retention OR DAIR

Search: (3.1 Domain: Revision arthroplasty AND 3.2 Domain: Total knee arthroplasty AND 3.3 Domain: Infection AND 3.4 Domain: Treatment), resulted in 28 hits.

## SciElo

### 4.1 Domain: Revision arthroplasty

reoperation OR revision surgery OR re-revision OR revision arthroplasty OR aseptic revision

AND

### 4.2 Domain: Total knee arthroplasty

total knee arthroplasty OR total knee prosthesis OR TKA OR total knee replacement

AND

### 4.3 Domain: Infection

joint infection OR prosthetic joint infection OR PJI OR periprosthetic joint infection OR positive cultures

AND

### 4.4 Domain: Treatment

debridement, antibiotics and implant retention OR DAIR OR implant retainment OR antibiotics OR debridement

Search: (4.1 Domain: Revision arthroplasty AND 4.2 Domain: Total knee arthroplasty AND 4.3 Domain: Infection AND 4.4 Domain: Treatment), resulted in 0 hits.

## LILACS

### 5.1 Domain: Revision total knee arthroplasty

reoperation OR revision surgery OR re-revision OR revision arthroplasty OR aseptic revision OR total knee arthroplasty OR total knee prosthesis OR TKA OR total knee replacement

AND

### 5.2 Domain: Infection

joint infection OR prosthetic joint infection OR PJI OR periprosthetic joint infection OR positive cultures

AND

### 5.3 Domain: Treatment

debridement, antibiotics and implant retention OR DAIR OR implant retainment OR antibiotics OR debridement

Search: (5.1 Domain: Revision total knee arthroplasty AND 5.2 Domain: Infection AND 5.3 Domain: Treatment), resulted in 1 hit.

#### **Trip Medical Database (unpaid version)**

##### **6.1 Domain: Revision total knee arthroplasty**

total joint arthroplasties OR aseptic revision OR revision arthroplasty OR knee arthroplasty  
OR revision

**AND**

##### **6.2 Domain: Infection**

prosthetic joint infection OR PJI OR periprosthetic joint infection

**AND**

##### **6.3 Domain: Treatment**

irrigation, debridement OR DAIR OR debridement, antibiotics, implant retention OR  
debridement OR surgical debridement

Search: (6.1 Domain: Revision total knee arthroplasty AND 6.2 Domain: Infection AND 6.3 Domain: Treatment), resulted in 54 hits.
